# Supplementary material for: Probucol protects against brain damage caused by intra-neural pyroptosis in rats with vascular dementia through inhibition of the Syk/Ros pathway
Source: Aging (Albany NY). 2024 Feb 23;16(5):4363–77. doi: 10.18632/aging.205593 (PMC10968675; doi:10.18632/aging.205593)
Supplement: Supplementary Table 1 [file aging-16-205593-s001.xls]

## Sheet: Figure 1
Supplementary Table 1. The raw data of this study.
Escape Lantecy
	sham												CCH												Probucol
1	52.327	52.018	49.513	56.312	52.865	53.584	53.973	55.686	47.22	56.274	51.105	53.297	56.299	54.137	53.185	57.403	52.551	47.229	55.98	50.494	49.615	52.402	52.442	56.929	57.23	54.757	51.694	52.097	55.746	54.916	55.527	49.13	46.557	57.416	53.02	54.58
2	41.812	43.055	52.784	39.54	43.025	48.834	45.265	49.029	40.362	38.675	39.811	50.723	51.414	49.439	48.807	54.147	50.513	46.408	53.006	51.124	42.963	50.295	45.653	49.337	49.777	52.655	50.107	42.52	47.251	43.791	48.55	37.778	38.483	47.726	44.434	45.826
3	27.754	30.642	31.246	27.365	31.354	31.526	32.466	32.547	28.069	32.176	31.598	28.379	48.705	50.978	45.825	49.445	41.962	48.913	48.174	50.509	51.24	51.589	47.025	48.66	35.105	31.926	22.385	30.677	36.938	34.712	33.533	31.758	33.888	31.477	33.432	31.459
4	20.877	25.398	22.478	19.532	21.376	22.252	23.466	20.972	22.374	20.201	21.516	21.965	44.632	44.15	40.106	42.53	44.776	45.505	47.756	45.073	46.034	44.031	42.365	44.025	29.052	26.567	20.097	29.133	30.99	28.009	30.22	24.958	31.012	27.692	25.779	24.768
5	18.432	20.944	20.801	20.799	21.608	22.668	21.975	19.466	18.642	22.62	22.349	18.727	42.082	41.407	42.638	42.339	39.086	40.887	40.357	44.666	43.069	45.616	42.277	40.534	21.861	22.041	19.751	20.818	24.845	22.822	20.316	23.989	23.884	23.667	24.725	22.232
6	15.865	18.489	19.019	19.022	15.238	15.039	15.882	19.749	18.066	19.258	18.648	19.225	39.394	38.143	44.034	39.128	39.051	43.928	43.807	43.34	42.546	43.129	43.338	38.06	17.29	22.807	20.313	17.871	21.512	22.972	21.719	16.613	17.058	19.813	16.796	22.887
	Time of crossing platform					Times percentage in target quarter(%)					Swimming speeds					Number of center stops						Length of stay at the center（s）
	Sham	CCH	Probucol			Sham	CCH	Probucol			Sham	CCH	Probucol			Control	Sham	CCH	Probucol			Control	Sham	CCH	Probucol
	5	1	4			43.123	28.95	43.357			21.708	23.406	25.234			10	11	2	5			100	104	29	62
	4	1	4			46.348	27.69	40.498			21.912	21.97	24.688			12	10	2	6			107	113	31	74
	5	2	4			41.461	26.975	39.478			20.34	24.105	25.854			12	9	3	7			113	111	24	63
	5	1	4			41.233	27.953	40.71			28.922	29.808	29.305			8	8	2	6			100	114	20	72
	4	1	3			46.89	31.678	40.076			27.283	22.117	22.019			11	8	1	7			106	114	21	68
	5	2	3			46.617	31.621	40.654			23.187	26.6	22.212			7	11	2	7			104	103	35	71
	4	1	3			45.264	28.328	43.432			25.856	27.239	20.359			7	8	3	5			108	113	30	62
	4	1	4			38.941	32.008	37.259			28.693	21.177	26.259			12	8	3	5			108	109	30	65
	5	1	4			42.087	31.42	44.141			22.346	26.671	28.925			8	8	2	7			112	100	22	60
	4	2	2			45.943	28.058	35.344			22.628	23.172	22.459			11	11	2	6			104	101	25	61
	4	2	4			45.762	30.085	37.157			29.412	22.645	24.143			8	12	1	7			107	111	20	65
	3	2	3			40.49	28.95	41.909			23.963	22.116	20.924			10	13	3	6			113	114	26	70
	Travel distance(m)						Number of hind leg stands
	Control	Sham	CCH	Probucol			Control	Sham	CCH	Probucol
	28	32	16	23			16	16	1	11
	28	29	16	22			15	17	3	9
	30	30	16	20			17	16	4	11
	29	31	16	20			16	16	4	10
	30	29	16	20			17	15	4	12
	32	31	17	24			19	17	1	10
	28	28	14	23			17	17	5	10
	30	30	17	22			16	15	1	9
	31	30	16	21			17	18	5	9
	29	33	15	23			15	18	3	12
	33	28	17	20			18	16	4	9
	31	31	17	21			19	15	3	12

## Sheet: Figure 2
	Sham	CHH	Probucol
	1	22	8
	1	18	8
	3	22	8
	4	19	9
	1	20	13
	3	23	9
	3	23	12
	5	20	12
	1	19	9
	4	21	9
	5	19	10
	1	22	13

## Sheet: Figure 3
gp91			p22			p47			syk-2
Sham	CHH	Probucol	Sham	CHH	Probucol	Sham	CHH	Probucol	Sham	CHH	Probucol
0.03	2.55	1.05	0.01	2.61	0.88	0.13	1.17	2.3	0.06	2.48	1.08
0.08	2.44	1.28	0.04	2.6	1	0.06	0.97	2.52	0.02	2.46	0.99
0.15	2.36	0.94	0.11	2.43	0.9	0.23	1.04	2.6	0.11	2.38	1.16
0.16	2.81	1.05	0.01	2.36	0.92	0.1	1.08	2.55	0.12	2.26	0.91
0.07	2.65	1.13	0.09	2.63	1.14	0.11	1.15	2.52	0.02	2.39	1.08
0.16	2.11	1	0.07	2.42	1.04	0.22	1.06	2.43	0.12	2.26	0.85
0.21	2.67	1.05	0.05	2.52	0.8	0.17	0.99	2.54	0.04	2.44	1.21
0.15	2.8	1.13	0.1	2.42	1.07	0.11	0.83	2.67	0.2	2.46	1.01
0.04	2.59	1.05	0.24	2.21	0.94	0.05	0.81	2.4	0.02	2.42	0.89
0.12	2.47	1.05	0.13	2.55	1.04	0.15	1.13	2.29	0.06	2.26	1.22
0.03	2.58	1.12	0.03	2.56	1.07	0.06	1	2.23	0.12	2.16	1.12
0.01	2.4	0.81	0.07	2.38	1.12	0.04	0.95	2.51	0.02	2.28	1.22

## Sheet: Figure 4
fig4A					fig4B
	Sham	CHH	Probucol			Sham	CHH	Probucol
	0.28	2.5	1			8.37	87.22	21.73
	0.5	2.55	1.49			8.5	86.19	24.36
	0.47	2.94	1.28			10.36	87.96	23.43
	0.44	3.52	1.45			9.62	83.66	24.1
	0.54	3.53	0.84			11.28	76.21	20.46
	0.14	2.73	1.13			8.14	81.86	25.86
	0.43	3.4	0.89			9.6	80.59	20.07
	0.31	2.87	1.49			11.88	88.15	25.62
	0.48	2.75	0.95			7.72	77.87	22.78
	0.27	2.88	0.81			9.31	79.83	25.09
	0.6	3.22	0.76			8.71	81.99	22.82
	0.15	2.85	1.35			12.45	89.12	21.58
fig4D
NLRP3			IL-1β			IL-18			ASC			Caspase-1
Sham	CHH	Probucol	Sham	CHH	Probucol	Sham	CHH	Probucol	Sham	CHH	Probucol	Sham	CHH	Probucol
0.37	3.42	1.1	0.47	2.71	0.92	0.32	2.89	1.31	0.51	2.94	0.82	0.22	2.68	0.9
0.32	2.61	1.46	0.44	2.72	1.13	0.28	2.98	1.09	0.5	2.53	1.32	0.18	3.39	1.28
0.19	2.75	1.05	0.07	2.27	1.32	0.14	2.68	1.22	0.45	3.09	1	0.51	2.97	1.44
0.35	3.32	1.4	0.17	2.39	1.13	0.27	2.73	0.72	0.35	3.46	1.05	0.52	2.58	0.87
0.44	2.61	0.76	0.24	2.83	0.67	0.05	2.61	1	0.53	2.49	1.01	0.38	2.64	0.85
0.49	2.94	1.21	0.41	2.48	1	0.2	2.5	0.72	0.17	3.29	1.12	0.13	3.07	1.05
0.22	2.52	1.26	0.22	2.62	1.27	0.16	2.99	1.2	0.42	2.89	1.09	0.33	2.85	1
0.46	2.99	1	0.24	2.24	0.92	0.35	2.97	1.22	0.43	2.5	0.68	0.32	2.89	0.91
0.39	3.38	0.97	0.33	2.6	0.95	0.26	2.71	1.35	0.16	3.4	0.69	0.12	3.37	0.85
0.49	2.58	0.93	0.36	2.49	0.63	0.5	2.49	0.6	0.14	2.77	1.2	0.39	3.38	0.69
0.44	2.97	1.37	0.4	2.76	1.03	0.09	2.39	0.9	0.33	3.06	0.78	0.23	3.05	1.39
0.42	3.55	1.47	0.46	3.06	1.33	0.25	2.21	1.05	0.48	3.31	0.64	0.09	2.64	1.02

## Sheet: Figure 5
fig5B	Caspase-3			Bax			Bcl-2
	Sham	CHH	Probucol	Sham	CHH	Probucol	Sham	CHH	Probucol
	0.43	3.47	1.14	0.19	2.71	0.7	2.83	0.11	1.04
	0.33	3.15	0.91	0.14	2.48	0.67	2.77	0.49	1.12
	0.26	2.73	0.68	0.17	2.47	1.22	3.45	0.07	1.23
	0.46	2.96	0.87	0.19	2.78	0.73	3.33	0.24	1.09
	0.12	2.54	0.76	0.1	2.88	0.72	3.07	0.07	1.44
	0.19	3.03	1.45	0.08	2.46	0.67	2.42	0.22	1.49
	0.14	2.83	1.4	0.37	2.46	0.66	2.63	0.37	1.38
	0.3	3.13	1.12	0.27	3.45	0.93	3.01	0.24	0.82
	0.14	2.58	1	0.05	3.22	1.13	2.65	0.2	1
	0.27	3.02	1.49	0.31	2.47	1.4	2.85	0.06	1.15
	0.17	2.72	0.82	0.37	2.52	1	3.1	0.25	1.18
	0.11	2.98	0.79	0.26	2.75	1.25	3.02	0.19	0.76
fig5C	Control	LO/LG	Probucol
	5.41	7.66	5.77
	5.13	8.91	5.14
	4.21	7.23	4.25

## Sheet: Figure 6
fig6A	p-Syk								gp91								p47
	0.17	0.21	1	0.31	2.68	2.92	0.17	0.16	0.13	0.09	1	0.32	2.85	2.36	0.23	0.25	0.05	0.1	0.78	0.54	2.72	2.59	0.07	0.2
	0.21	0.13	1.22	0.4	2.27	2.41	0.2	0.21	0.21	0.2	1.13	0.46	2.34	2.81	0.16	0.05	0.2	0.21	1	0.38	3.06	3.07	0.12	0.05
	0.15	0.05	0.9	0.47	2.88	2.29	0.07	0.08	0.09	0.09	0.76	0.3	2.96	2.94	0.15	0.12	0.18	0.07	1.13	0.51	2.8	2.72	0.23	0.12
	p22
	0.18	0.12	0.79	0.52	2.35	2.89	0.09	0.11
	0.23	0.14	1	0.44	3.23	3.28	0.23	0.09
	0.09	0.24	1.24	0.26	2.74	2.57	0.19	0.21
fig6B	NLRP3								ASC								Caspase-1
	0.13	0.18	0.94	0.34	3.12	3.12	0.21	0.11	0.19	0.16	1	0.33	2.66	3.14	0.35	0.27	0.23	0.05	0.77	0.32	2.25	2.7	0.08	0.18
	0.07	0.26	1.13	0.21	2.94	2.73	0.1	0.2	0.09	0.17	1.23	0.26	2.88	3	0.28	0.34	0.1	0.16	1	0.36	3.28	3.14	0.2	0.16
	0.24	0.05	1	0.43	2.38	3.13	0.17	0.15	0.1	0.06	0.94	0.37	3.09	2.75	0.31	0.15	0.12	0.23	1.16	0.19	2.58	2.78	0.07	0.08
